# Supplementary material for: Towards high potential and ultra long-life cathodes for sodium ion batteries: freestanding 3D hybrid foams of Na7V4(P2O7)4(PO4) and Na7V3(P2O7)4@biomass-derived porous carbon
Source: Royal Society of Chemistry journal article supplement (doi:10.1039/c6ta01465h), 2016-01-01
Supplement: c6ta01465h1.pdf [file c6ta01465h1.pdf]

## Supporting information

**Figure S1:** Morphology of the  $\text{Na}_7\text{V}_3(\text{P}_2\text{O}_7)_4$ -based hybrid foam. (a) Low-resolution TEM image, (b) TEM image partially enlarged from a, (c) HRTEM image of polyanion crystal. The well-resolved lattice fringe indicates the single-crystal nature of polyanion crystals.

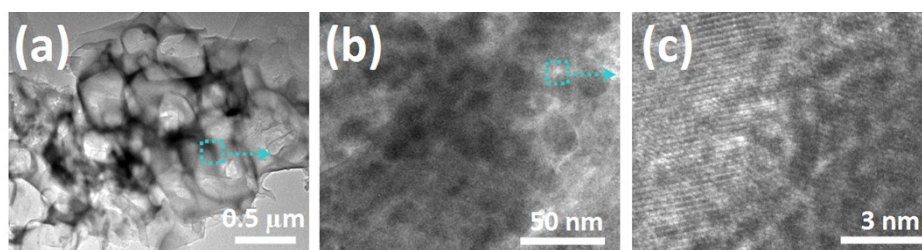

**Figure S2:** Morphology of the (a, b)  $\text{Na}_7\text{V}_4(\text{P}_2\text{O}_7)_4(\text{PO}_4)$ - and (c, d)  $\text{Na}_7\text{V}_3(\text{P}_2\text{O}_7)_4$ -based reference samples. Both reference samples have large microscale particles in solid nature.

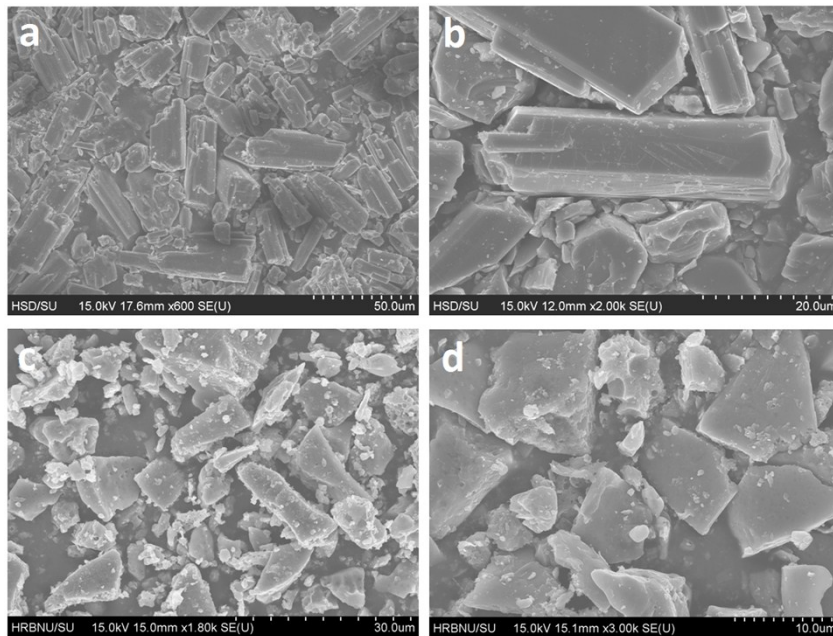

**Figure S3:** XRD patterns of the (a)  $\text{Na}_7\text{V}_4(\text{P}_2\text{O}_7)_4(\text{PO}_4)$ - and (b)  $\text{Na}_7\text{V}_3(\text{P}_2\text{O}_7)_4$ -based reference samples. All the diffraction peaks of the  $\text{Na}_7\text{V}_4(\text{P}_2\text{O}_7)_4(\text{PO}_4)$ -based reference sample can be indexed to the tetragonal phase with space group of  $P-42_1c$ , and those of the  $\text{Na}_7\text{V}_3(\text{P}_2\text{O}_7)_4$ -based reference sample can be indexed to the monoclinic structure with  $C2/c$  space group. The absence of impurity phases indicates the high purity of all the reference samples.

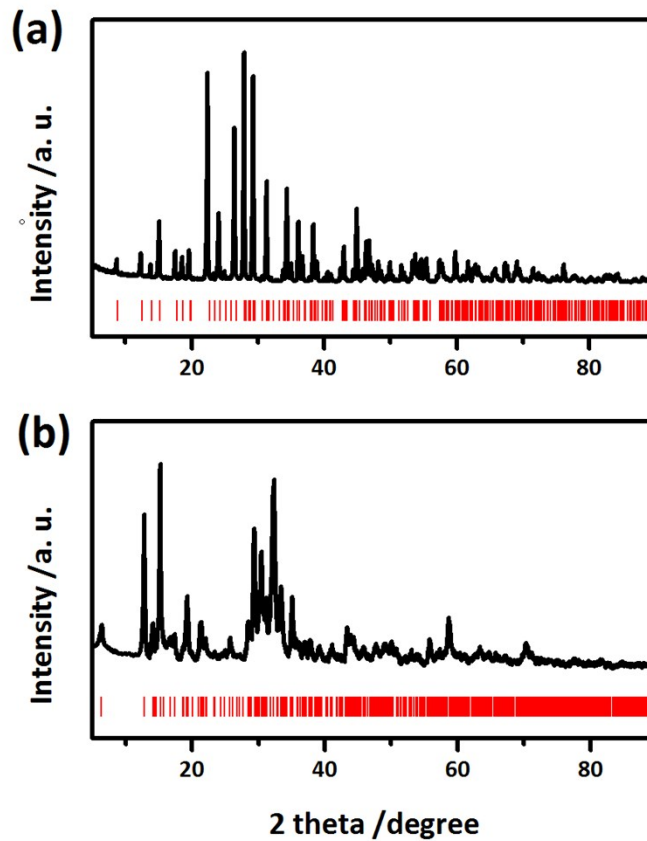

**Table S1** Atomic ratios of the (a)  $\text{Na}_7\text{V}_4(\text{P}_2\text{O}_7)_4(\text{PO}_4)$ - and (b)  $\text{Na}_7\text{V}_3(\text{P}_2\text{O}_7)_4$ - based hybrid foams and reference samples.

| Element ratio of Na: V: P | $\text{Na}_7\text{V}_4(\text{P}_2\text{O}_7)_4(\text{PO}_4)$ | Element ratio of Na: V: P | $\text{Na}_7\text{V}_3(\text{P}_2\text{O}_7)_4$ |
|---------------------------|--------------------------------------------------------------|---------------------------|-------------------------------------------------|
| Hybrid foam               | 6.987:4:9.041                                                | Hybrid foam               | 6.991:3:8.031                                   |
| Reference sample          | 7.021:4:9.032                                                | Reference sample          | 6.997:3:8.026                                   |
| Designed value            | 7:4:9                                                        | Designed value            | 7:3:8                                           |
